# Supplementary material for: A new risk score for patients after first recurrence of stage 4 neuroblastoma aged ≥18 months at first diagnosis
Source: PubMed Central journal article supplement (PMC6885891; doi:10.1002/cam4.2562), 2019-10-20
Supplement: CAM4-8-7236-s001.pdf [file CAM4-8-7236-s001.pdf]

## **Content of Online-Only Supplemental Information**

### **Supplemental Table S1**

Frequencies of organs involved in 469 patients with recurrences

### **Supplemental Table S2**

Frequencies and univariate prognostic impact of the non-time-dependent variables analyzed

### **Supplemental Table S3**

Analyzed time-dependent variables with Cox proportional hazard estimations for secondary event-free survival

### **Supplemental Table S4**

Distribution of prognostic index values and risk classes in the training set, validation set and total set

### **Supplemental Table S5**

Distribution of the identified risk factors in the defined risk groups.

### **Supplemental Figure S1**

Kaplan-Meier estimations for secondary event-free and secondary overall survival according to the proposed risk score and with curative intent.

|                                |                                              |
|--------------------------------|----------------------------------------------|
| <b>Supplemental Figure S1A</b> | EFS of patients treated with curative intent |
| <b>Supplemental Figure S1B</b> | OS of patients treated in curative intent    |
| <b>Supplemental Figure S1C</b> | EFS of patients treated in palliative intent |
| <b>Supplemental Figure S1D</b> | OS of patients treated in palliative intent  |

## Supplemental Table S1

Frequencies of organs involved in 469 patients with recurrences

| <b>Recurrence site</b>                   | <b>%</b> | <b>N*</b> |
|------------------------------------------|----------|-----------|
| Primary tumor site                       | 46.7     | 219       |
| Osteomedullary                           | 66.5     | 312       |
| Central nervous system                   | 14.5     | 68        |
| Lymph nodes                              | 10.0     | 47        |
| Liver                                    | 10.4     | 49        |
| Lung/pleura                              | 4.5      | 21        |
| Other sites                              | 2.6      | 12        |
|                                          |          |           |
| <b>special cases of recurrence sites</b> | <b>%</b> | <b>N*</b> |
| Primary tumor alone                      | 15.4     | 72        |
| Osteomedullary alone                     | 27.5     | 129       |
| Central nervous system alone             | 9.4      | 44        |
| Lymph nodes alone                        | 1.3      | 6         |
| Primary tumor and osteomedullary         | 27.1     | 127       |
| Primary tumor and CNS                    | 0.9      | 4         |

\*number of patients with involved sites

Central nervous system (CNS) metastasis: presence of neuroblastoma cells in cerebrospinal liquor, intracerebral lesions, and/or limited nodular or areal thickening of meninges diagnosed by computed tomography or magnetic resonance imaging.

Osteomedullary metastases: scintigraphic accumulation of the tracer in the skeleton and comprised bone marrow and bone.

## Supplemental Table S2

Frequencies and univariate prognostic impact of the non-time-dependent variables analyzed ( $N=469$ )

| Variable                                                    | Missings* | Median (Range)     | Categories                       | numbers (percent) | Wald $P$ | Comparison                                           | HR (95% CI)           |
|-------------------------------------------------------------|-----------|--------------------|----------------------------------|-------------------|----------|------------------------------------------------------|-----------------------|
| <b>LOH 1p aberration</b>                                    | 167       | n.a.               | no (ref.)                        | 150 (50)          | 0.010    | yes vs. no                                           | 1.37 (1.08 – 1.74)    |
|                                                             |           |                    | yes                              | 152 (50)          |          |                                                      |                       |
| <b>HVA</b>                                                  | 34        | n.a.               | normal/borderline for age (ref.) | 40 (9)            | 0.115    | abnormal vs. normal/borderline                       | 1.34 (0.93 – 1.92)    |
|                                                             |           |                    | abnormal                         | 395 (91)          |          |                                                      |                       |
| <b>VMA</b>                                                  | 26        | n.a.               | normal/borderline for age (ref.) | 74 (17)           | 0.497    | abnormal vs. normal/borderline                       | 1.10 (0.84 – 1.45)    |
|                                                             |           |                    | abnormal                         | 369 (83)          |          |                                                      |                       |
| <b>NSE</b>                                                  | 45        | n.a.               | normal/borderline for age (ref.) | 6 (1)             | 0.349    | abnormal vs. normal/borderline                       | 1.53 (0.63 – 3.69)    |
|                                                             |           |                    | abnormal                         | 418 (99)          |          |                                                      |                       |
| <b>MYCN amplification</b>                                   | 48        | n.a.               | no (ref.)                        | 310 (67)          | <0.001   | yes vs. no                                           | 1.44 (1.17 – 1.77)    |
|                                                             |           |                    | yes                              | 155 (33)          |          |                                                      |                       |
| <b>remission status after induction therapy, summarized</b> | 21        | n.a.               | CR/VGPR/PR/MR (ref.)             | 426 (95)          | 0.015    | NR/progression/recurrence vs. VR/TR/sgTR/gR          | 1.73 (1.11 – 2.69)    |
|                                                             |           |                    | NR/PROG/REC                      | 22 (5)            |          |                                                      |                       |
| <b>time period of first recurrence</b>                      | 4         | n.a.               | during induction therapy (ref.)  | 39 (8)            | 0.108    | After induction therapy vs. during induction therapy | 0.75 (0.53 – 1.07)    |
|                                                             |           |                    | after induction therapy          | 280 (60)          |          |                                                      |                       |
|                                                             |           |                    | after first line therapy         | 146 (31)          |          |                                                      |                       |
| <b>LDH</b>                                                  | 7         | n.a.               | normal/borderline for age (ref.) | 20 (4)            | 0.071    | abnormal vs. normal/borderline                       | 1.59 (0.96 – 2.62)    |
|                                                             |           |                    | abnormal                         | 442 (96)          |          |                                                      |                       |
| <b>age at diagnosis binary</b>                              | 0         | n.a.               | <42 months                       | 240 (51)          | 0.030    | <42m vs. ≥42m                                        | 1.24 (1.02 – 1.50)    |
|                                                             |           |                    | ≥42 months (ref.)                | 229 (49)          |          |                                                      |                       |
| <b>age at diagnosis in months</b>                           | 0         | 41.0 (31.0 – 59.4) | n.a.                             |                   | 0.677    |                                                      | 0.999 (0.997 – 1.002) |

|                                                                       |   |                    |                  |          |        |                           |                       |
|-----------------------------------------------------------------------|---|--------------------|------------------|----------|--------|---------------------------|-----------------------|
| <b>time from diagnosis to first recurrence binary</b>                 | 0 | n.a.               | <18 months       | 230 (49) | <0.001 | <18m vs. ≥18m             | 2.45 (2.01 – 2.99)    |
|                                                                       |   |                    | ≥18 months (ref) | 239 (51) |        |                           |                       |
| <b>time from diagnosis to first recurrence in months</b>              | 0 | 18.1 (13.0 - 25.1) | n.a.             |          | <0.001 |                           | 0.97 (0.96 – 0.98)    |
| <b>first line therapy antibody</b>                                    | 0 | n.a.               | no (ref.)        | 371 (79) | 0.282  | yes vs. no                | 0.88 (0.69 – 1.11)    |
|                                                                       |   |                    | yes              | 98 (21)  |        |                           |                       |
| <b>first line therapy ASCT</b>                                        | 0 | n.a.               | no (ref.)        | 126 (27) | <0.001 | yes vs. no                | 0.60 (0.49 – 0.75)    |
|                                                                       |   |                    | yes              | 343 (73) |        |                           |                       |
| <b>first line therapy isotretinoin</b>                                | 0 | n.a.               | no (ref.)        | 179 (38) | <0.001 | yes vs. no                | 0.62 (0.51 – 0.76)    |
|                                                                       |   |                    | yes              | 290 (62) |        |                           |                       |
| <b>first line therapy, maintenance chemotherapy, number of cycles</b> | 0 | 0 (0 – 0)          | n.a.             |          | 0.213  |                           | 1.04 (0.98 – 1.11)    |
| <b>first line therapy, maintenance chemotherapy</b>                   | 0 | n.a.               | no (ref.)        | 396 (82) | 0.122  | yes vs. no                | 1.23 (0.95 – 1.59)    |
|                                                                       |   |                    | yes              | 73 (16)  |        |                           |                       |
| <b>first line therapy mIBG</b>                                        | 0 | n.a.               | no (ref.)        | 355 (76) | 0.013  | yes vs. no                | 0.75 (0.59 – 0.94)    |
|                                                                       |   |                    | yes              | 114 (24) |        |                           |                       |
| <b>first line therapy radiotherapy percutaneous</b>                   | 0 | n.a.               | no (ref.)        | 408 (87) | 0.089  | yes vs. no                | 0.78 (0.58 – 1.04)    |
|                                                                       |   |                    | yes              | 61 (13)  |        |                           |                       |
| <b>first line therapy, best result of operation</b>                   | 0 | n.a.               | no operation     | 37 (8)   | 0.608  | no operation vs. complete | 0.91 (0.63 – 1.31)    |
|                                                                       |   |                    | biopsy           | 32 (7)   | 0.250  | biopsy vs. complete       | 1.25 (0.85 – 1.84)    |
|                                                                       |   |                    | incomplete       | 194 (41) | 0.008  | incomplete vs. complete   | 0.75 (0.61 – 0.93)    |
|                                                                       |   |                    | complete (ref.)  | 206 (44) |        |                           |                       |
| <b>first line therapy, number of chemotherapy cycles</b>              | 0 | 6 (6 – 8)          | n.a.             |          | 0.041  |                           | 0.924 (0.857 – 0.997) |
| <b>first line therapy, number of N5 cycles</b>                        | 0 | 3 (3 – 3)          | n.a.             |          | 0.011  |                           | 0.728 (0.571 – 0.930) |
| <b>first line therapy, number of N6 cycles</b>                        | 0 | 3 (3 – 3)          | n.a.             |          | 0.010  |                           | 0.718 (0.559 - 0.924) |

|                                                                 |   |                 |                              |          |        |                  |                       |
|-----------------------------------------------------------------|---|-----------------|------------------------------|----------|--------|------------------|-----------------------|
| <b>first line therapy, number of N8 cycles</b>                  | 0 | 0 (0 – 2)       | n.a.                         |          | 0.149  |                  | 0.923 (0.827 – 1.029) |
| <b>first line therapy, other therapies</b>                      | 0 | n.a.            | no (ref.)                    | 459 (98) | 0.471  | yes vs. no       | 0.79 (0.42 – 1.49)    |
|                                                                 |   |                 | yes                          | 10 (2)   |        |                  |                       |
| <b>first line therapy, time from end to recurrence (months)</b> | 0 | 1.1 (0.2 – 4.7) | n.a.                         |          | <0.001 |                  | 0.98 (0.97 – 0.99)    |
| <b>induction chemotherapy, time in months</b>                   | 0 | 5.3 (4.6 – 6.6) | n.a.                         |          | 0.113  |                  | 0.96 (0.91 – 1.01)    |
| <b>localization of tumor sites at diagnosis</b>                 | 0 | n.a.            | only metastases (ref.)       | 4 (1)    | 0.345  | PT+METS vs. METS | 1.73 (0.56 – 5.38)    |
|                                                                 |   |                 | primary tumor and metastases | 465 (99) |        |                  |                       |
| <b>metastasis bone/bone marrow at first diagnosis</b>           | 0 | n.a.            | no (ref.)                    | 12 (3)   | 0.097  | yes vs. no       | 0.62 (0.35 – 1.09)    |
|                                                                 |   |                 | yes                          | 457 (97) |        |                  |                       |
| <b>metastasis bone/bone marrow at first recurrence</b>          | 0 | n.a.            | no (ref.)                    | 157 (33) | 0.236  | yes vs. no       | 1.13 (0.92 – 1.39)    |
|                                                                 |   |                 | yes                          | 312 (67) |        |                  |                       |
| <b>metastasis CNS at first diagnosis</b>                        | 0 | n.a.            | no (ref.)                    | 453 (97) | 0.128  | yes vs. no       | 1.52 (0.89 – 2.59)    |
|                                                                 |   |                 | yes                          | 16 (3)   |        |                  |                       |
| <b>metastasis CNS at first recurrence</b>                       | 0 | n.a.            | no (ref.)                    | 401 (85) | 0.065  | yes vs. no       | 1.29 (0.98 – 1.70)    |
|                                                                 |   |                 | yes                          | 68 (15)  |        |                  |                       |
| <b>metastasis intracranial at first diagnosis</b>               | 0 | n.a.            | no (ref.)                    | 400 (85) | 0.196  | yes vs. no       | 1.20 (0.91 – 1.57)    |
|                                                                 |   |                 | yes                          | 69 (15)  |        |                  |                       |
| <b>metastasis intracranial at first recurrence</b>              | 0 | n.a.            | no (ref.)                    | 453 (97) | 0.030  | yes vs. no       | 1.74 (1.05 – 2.88)    |
|                                                                 |   |                 | yes                          | 16 (3)   |        |                  |                       |
| <b>metastasis liver at first diagnosis</b>                      | 0 | n.a.            | no (ref.)                    | 414 (88) | <0.001 | yes vs. no       | 1.80 (1.35 – 2.41)    |
|                                                                 |   |                 | yes                          | 55 (12)  |        |                  |                       |
| <b>metastasis liver at first recurrence</b>                     | 0 | n.a.            | no (ref.)                    | 420 (90) | 0.007  | yes vs. no       | 1.52 (0.12 – 2.06)    |
|                                                                 |   |                 | yes                          | 49 (10)  |        |                  |                       |

|                                                                   |   |           |               |          |        |                        |                       |
|-------------------------------------------------------------------|---|-----------|---------------|----------|--------|------------------------|-----------------------|
| <b>metastasis lung/pleura at first diagnosis</b>                  | 0 | n.a.      | no (ref.)     | 434 (93) | 0.070  | yes vs. no             | 1.39 (0.97 – 1.99)    |
|                                                                   |   |           | yes           | 35 (7)   |        |                        |                       |
| <b>metastasis lung/pleura at first recurrence</b>                 | 0 | n.a.      | no (ref.)     | 448 (96) | <0.001 | yes vs. no             | 2.41 (1.55 – 3.75)    |
|                                                                   |   |           | yes           | 21 (4)   |        |                        |                       |
| <b>metastasis lymph nodes at first diagnosis</b>                  | 0 | n.a.      | no (ref.)     | 362 (77) | 0.731  | yes vs. no             | 0.96 (0.76 – 1.21)    |
|                                                                   |   |           | yes           | 107 (23) |        |                        |                       |
| <b>metastasis lymph nodes at first recurrence</b>                 | 0 | n.a.      | no (ref.)     | 422 (90) | 0.077  | yes vs. no             | 1.32 (0.97 – 1.79)    |
|                                                                   |   |           | yes           | 47 (10)  |        |                        |                       |
| <b>metastasis other sites at first diagnosis</b>                  | 0 | n.a.      | no (ref.)     | 445 (95) | 0.359  | yes vs. no             | 1.23 (0.79 – 1.91)    |
|                                                                   |   |           | yes           | 24 (5)   |        |                        |                       |
| <b>metastasis other sites at first recurrence</b>                 | 0 | n.a.      | no (ref.)     | 457 (97) | 0.337  | yes vs. no             | 1.33 (0.75 – 2.36)    |
|                                                                   |   |           | yes           | 12 (3)   |        |                        |                       |
| <b>metastatic sites at first recurrence, number of</b>            | 0 | 1 (0 – 1) | n.a.          |          | <0.001 |                        | 1.373 (1.209 – 1.559) |
| <b>metastatic sites at first recurrence, summarized number of</b> | 0 | n.a.      | none (ref.)   | 73 (16)  |        |                        |                       |
|                                                                   |   |           | one           | 290 (62) | 0.124  | one vs. none           | 1.25 (0.94 – 1.66)    |
|                                                                   |   |           | more than one | 106 (23) | <0.001 | more than one vs. none | 2.23 (1.62 – 3.08)    |
| <b>metastatic sites, binary number of</b>                         | 0 | n.a.      | one (ref.)    | 256 (55) | 0.042  | more than one vs. one  | 1.22 (1.01 – 1.48)    |
|                                                                   |   |           | more than one | 213 (45) |        |                        |                       |
| <b>metastatic sites, number of</b>                                | 0 | 1 (1 – 2) | n.a.          |          | 0.009  |                        | 1.17 (1.04 – 1.32)    |
| <b>primary tumor site pelvical</b>                                | 0 | n.a.      | no (ref.)     | 462 (99) | 0.702  | yes vs. no             | 1.16 (0.55 – 2.45)    |
|                                                                   |   |           | yes           | 7 (1)    |        |                        |                       |
| <b>primary tumor site adrenal</b>                                 | 0 | n.a.      | no (ref.)     | 196 (42) | 0.249  | yes vs. no             | 1.12 (0.92 – 1.36)    |
|                                                                   |   |           | yes           | 273 (58) |        |                        |                       |

|                                                   |   |           |                      |          |        |                                     |                    |
|---------------------------------------------------|---|-----------|----------------------|----------|--------|-------------------------------------|--------------------|
| <b>primary tumor site adrenal at recurrence</b>   | 0 | n.a.      | no (ref.)            | 405 (86) | 0.308  | yes vs. no                          | 1.16 (0.87 – 1.53) |
|                                                   |   |           | yes                  | 64 (14)  |        |                                     |                    |
| <b>primary tumor site cervical</b>                | 0 | n.a.      | no (ref.)            | 461 (98) | 0.394  | yes vs. no                          | 1.36 (0.67 – 2.73) |
|                                                   |   |           | yes                  | 8 (2)    |        |                                     |                    |
| <b>primary tumor site abdominal</b>               | 0 | n.a.      | no (ref.)            | 317 (68) | 0.252  | yes vs. no                          | 0.89 (0.72 – 1.09) |
|                                                   |   |           | yes                  | 152 (32) |        |                                     |                    |
| <b>primary tumor site abdominal at recurrence</b> | 0 | n.a.      | no (ref.)            | 344 (73) | 0.578  | yes vs. no                          | 0.94 (0.76 – 1.17) |
|                                                   |   |           | yes                  | 125 (27) |        |                                     |                    |
| <b>primary tumor site thoracic</b>                | 0 | n.a.      | no (ref.)            | 397 (85) | 0.449  | yes vs. no                          | 1.11 (0.85 – 1.44) |
|                                                   |   |           | yes                  | 72 (15)  |        |                                     |                    |
| <b>primary tumor site thoracic at recurrence</b>  | 0 | n.a.      | no (ref.)            | 436 (93) | 0.669  | yes vs. no                          | 1.08 (0.75 – 1.56) |
|                                                   |   |           | yes                  | 33 (7)   |        |                                     |                    |
| <b>primary tumor sites, number of</b>             | 0 | 1 (1 – 1) | n.a.                 |          | 0.390  |                                     | 1.12 (0.87 – 1.44) |
| <b>primary tumor sites, summarized number of</b>  | 0 | n.a.      | none (ref.)          | 4 (1)    |        |                                     |                    |
|                                                   |   |           | one                  | 427 (91) | 0.353  | one vs. none                        | 1.71 (0.55 – 5.34) |
|                                                   |   |           | more than one        | 38 (8)   | 0.277  | more than one vs. none              | 1.93 (0.59 – 6.28) |
| <b>recurrence at primary tumor site</b>           | 0 | n.a.      | no (ref.)            | 250 (53) | 0.675  | yes vs. no                          | 1.04 (0.86 – 1.26) |
|                                                   |   |           | yes                  | 219 (47) |        |                                     |                    |
| <b>recurrence sites, binary number of</b>         | 0 | n.a.      | one (ref.)           | 264 (56) | <0.001 | more than one vs. one               | 1.71 (1.41 – 2.08) |
|                                                   |   |           | more than one        | 205 (44) |        |                                     |                    |
| <b>recurrence sites, combinations</b>             | 0 | n.a.      | local only (ref.)    | 72 (15)  |        |                                     |                    |
|                                                   |   |           | metastases only      | 250 (53) | 0.049  | metastases only vs. local only      | 1.34 (1.00 – 1.78) |
|                                                   |   |           | local and metastases | 147 (31) | 0.001  | local and metastases vs. local only | 1.67 (1.23 – 2.27) |
| <b>recurrence sites, number of</b>                | 0 | 1 (1 – 2) | n.a.                 |          | <0.001 |                                     | 1.34 (1.20 – 1.51) |

|              |   |      |            |          |       |               |                    |
|--------------|---|------|------------|----------|-------|---------------|--------------------|
| <b>Trial</b> | 0 | n.a. | NB97(ref.) | 183 (39) | 0.092 | NB04 vs. NB97 | 1.18 (0.97 – 1.44) |
|              |   |      | NB04       | 286 (61) |       |               |                    |

|                  |                                                                                |
|------------------|--------------------------------------------------------------------------------|
| ASCT             | high-dose chemotherapy with autologous stem cell transplantation               |
| CNS              | central nervous system                                                         |
| CR               | complete remission                                                             |
| d                | Days                                                                           |
| EFS              | event-free survival from diagnosis to first recurrence                         |
| histology diff   | histology differentiating, ganglioneuroblastoma nodular, ganglioneuroma (INPC) |
| histology undiff | histology undifferentiated or low differentiated (INPC)                        |
| HVA              | homovanillic acid in urine at initial diagnosis                                |
| INPC             | international neuroblastoma pathology classification                           |
| LDH              | lactate dehydrogenase in serum at first diagnosis                              |
| LOH 1p           | loss of heterozygosity of chromosome 1p                                        |
| M                | Months                                                                         |
| METS             | Metastases                                                                     |
| mIBG             | Metaiodobenzylguanidine                                                        |
| Missings*        | Colors: red >15% missings, yellow >0-15% missings, green 0% missings           |
| MR               | mixed remission/stable disease                                                 |
| N                | Number                                                                         |
| n.a.             | not applicable                                                                 |
| NR               | no remission                                                                   |
| NSE              | neuron specific enolase in serum at initial diagnosis                          |
| PR               | partial remission                                                              |
| PROG             | progression (from residual tumor)                                              |
| PT               | primary tumor site                                                             |
| REC              | recurrence (from CR/VGPR)                                                      |
| VGPR             | very good partial remission                                                    |
| VMA              | vanillylmandelic acid in urine at initial diagnosis                            |
| Y                | Years                                                                          |



### Supplemental Table S3

Analyzed time-dependent variables with Cox proportional hazard estimations for secondary event-free survival ( $N=469$ ).

| Variable                                             | Missings | Categories     | Numbers | Wald <i>P</i> | Comparison                   | HR (95% CI)           |
|------------------------------------------------------|----------|----------------|---------|---------------|------------------------------|-----------------------|
| <b>palliative treatment</b>                          | 0        | yes            | 97      | < 0.001       | yes vs. no                   | 5.324 (4.128 – 6.868) |
|                                                      |          | no (ref.)      | 372     |               |                              |                       |
| <b>second line therapy chemotherapy</b>              | 0        | time-dependent | n.a.    | < 0.001       | yes vs. no (time- dependent) | 0.407 (0.322 – 0.513) |
| <b>second line therapy ASCT</b>                      | 0        | time-dependent | n.a.    | 0.008         | yes vs. no (time- dependent) | 0.071 (0.010 – 0.504) |
| <b>second line therapy radiotherapy percutaneous</b> | 0        | time-dependent | n.a.    | 0.201         | yes vs. no (time- dependent) | 0.727 (0.446 – 1.185) |
| <b>second line therapy antibody</b>                  | 0        | time-dependent | n.a.    | 0.051         | yes vs. no (time-dependent)  | 0.589 (0.347 – 1.001) |
| <b>second line therapy mIBG</b>                      | 0        | time-dependent | n.a.    | 0.029         | yes vs. no (time- dependent) | 0.212 (0.053 – 0.852) |
| <b>second line therapy operation</b>                 | 0        | time-dependent | n.a.    | 0.007         | yes vs. no (time- dependent) | 0.149 (0.037 – 0.599) |
| <b>second line therapy isotretinoin</b>              | 0        | time-dependent | n.a.    | 0.576         | yes vs. no (time- dependent) | 0.841 (0.458 – 1.543) |
| <b>second line therapy maintenance chemotherapy</b>  | 0        | time-dependent | n.a.    | 0.550         | yes vs. no (time- dependent) | 0.549 (0.077 – 3.915) |

### Supplemental Table S4

Distribution of prognostic index values and risk classes in the training set, validation set and total set

| Risk class          | PI*   | Validation set (N=159) | Training set (N=310) | Overall set (N=469) |
|---------------------|-------|------------------------|----------------------|---------------------|
|                     |       | N                      | N                    | N                   |
| lower               | 0.000 | 6                      | 14                   | 20                  |
| lower               | 0.253 | 2                      | 12                   | 14                  |
| lower               | 0.438 | 18                     | 36                   | 54                  |
| <b>intermediate</b> |       |                        |                      |                     |
| intermediate        | 0.570 | 1                      | 1                    | 2                   |
| intermediate        | 0.690 | 16                     | 31                   | 47                  |
| intermediate        | 0.707 | 5                      | 8                    | 13                  |
| intermediate        | 0.820 | 11                     | 22                   | 33                  |
| intermediate        | 0.822 | 0                      | 1                    | 1                   |
| intermediate        | 0.959 | 8                      | 11                   | 19                  |
| intermediate        | 1.007 | 2                      | 2                    | 4                   |
| intermediate        | 1.073 | 8                      | 17                   | 25                  |
| intermediate        | 1.144 | 10                     | 18                   | 28                  |
| <b>higher</b>       |       |                        |                      |                     |
| higher              | 1.258 | 3                      | 8                    | 11                  |
| higher              | 1.260 | 2                      | 4                    | 6                   |
| higher              | 1.277 | 0                      | 1                    | 1                   |
| higher              | 1.390 | 0                      | 5                    | 5                   |
| higher              | 1.397 | 14                     | 23                   | 37                  |
| higher              | 1.511 | 5                      | 7                    | 12                  |
| higher              | 1.527 | 12                     | 18                   | 30                  |
| higher              | 1.529 | 1                      | 1                    | 2                   |
| higher              | 1.714 | 2                      | 3                    | 5                   |
| higher              | 1.780 | 11                     | 35                   | 46                  |
| higher              | 1.828 | 1                      | 3                    | 4                   |
| higher              | 1.965 | 5                      | 6                    | 11                  |
| higher              | 1.967 | 4                      | 7                    | 11                  |
| higher              | 2.081 | 1                      | 0                    | 1                   |
| higher              | 2.097 | 1                      | 3                    | 4                   |
| higher              | 2.218 | 6                      | 8                    | 14                  |
| higher              | 2.350 | 1                      | 3                    | 4                   |
| higher              | 2.535 | 3                      | 1                    | 4                   |
| higher              | 2.787 | 0                      | 1                    | 1                   |

\* Ranging from 0 to 2.787 with a median of 1.11 (95%-CI 1.01 - 1.14), the optimal two cut-offs were at C1=0.50 and C2=1.20.

The medians (95%-CI) for the training- and validation- set were 1.11 (1.01-1.14) and 1.14 (1.07-1.40). In both datasets, the PI was rather bimodal distributed with single peaks at the left and right side of the median.

**Supplemental Table S5:** Distribution of the identified risk factors in the defined risk groups.

| <b>Variable</b>                           | <b>Risk group lower (N=88)<br/>N (%)</b> | <b>Risk group Intermediate (N=172)<br/>N (%)</b> | <b>Risk group higher (N=209)<br/>N (%)</b> | <b>Overall (N=496)<br/>N (%)</b> |
|-------------------------------------------|------------------------------------------|--------------------------------------------------|--------------------------------------------|----------------------------------|
| <b>EFS (&lt;18 months)</b>                | 0 (0%)                                   | 60 (34.9%)                                       | 170 (81.3%)                                | 230 (46.4%)                      |
| <b>Age at diagnosis (&lt;42 months)</b>   | 14 (15.9%)                               | 92 (53.5%)                                       | 134 (64.1%)                                | 240 (48.4%)                      |
| <b>Liver metastasis at diagnosis</b>      | 0 (0)                                    | 7 (4.1%)                                         | 48 (23.0%)                                 | 55 (11.1%)                       |
| <b>Progress in primary Tumor site</b>     | 34 (38.6%)                               | 93 (54.1%)                                       | 92 (44.0%)                                 | 219 (44.2%)                      |
| <b>Number of recurrence sites (&gt;1)</b> | 0 (0)                                    | 58 (33.7%)                                       | 147 (70.3%)                                | 205 (41.3%)                      |

**Figure S1**

Kaplan-Meier estimations for secondary event-free and secondary overall survival according to the proposed risk score and with curative intent. Validation set total n=159. Patients treated with curative intent (n=126): Risk group lower (n=24 patients), risk group intermediate (n=51 patients), and risk group higher(n=51). Patients treated with palliative intent (n=33): Risk group lower (n=2 patients), risk group intermediate (n=10patients), and risk group higher(n=21)

**Supplemental Figure S1A**

EFS of patients treated with curative intent of the validation set n=126.

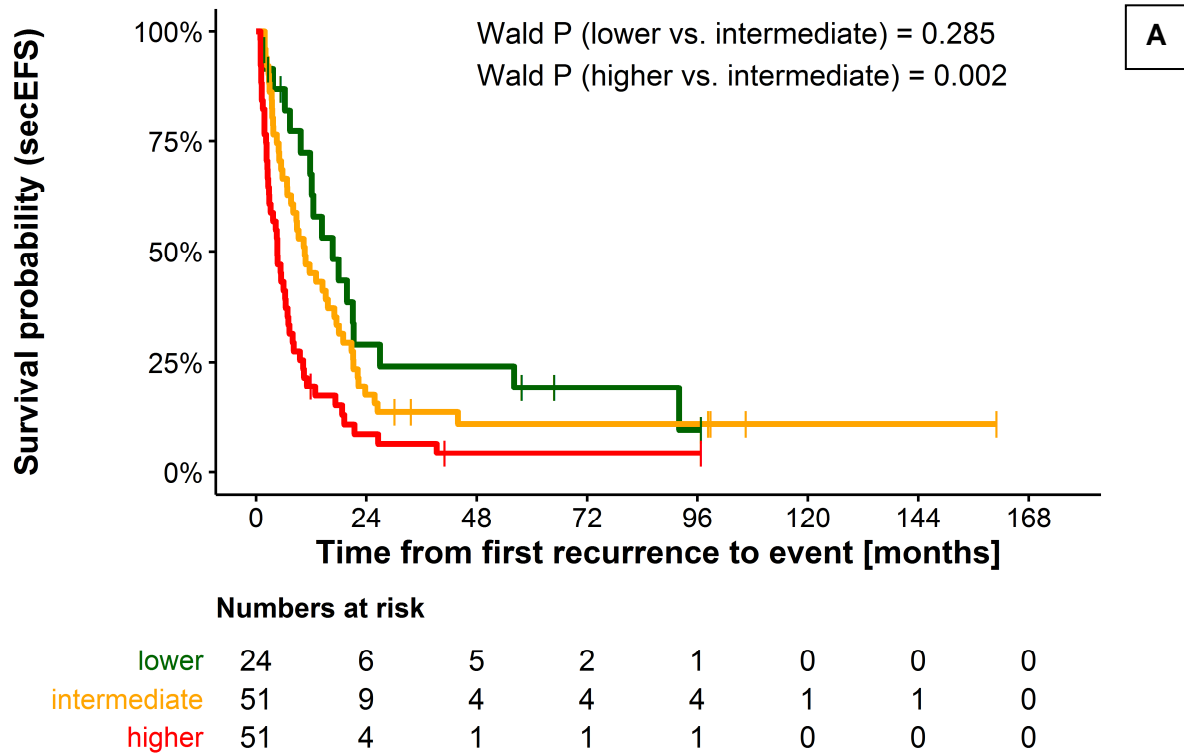

The 2-year secEFS proportions were 27.8% (95%-CI 8.4 - 47.3) for risk group lower, 11.0% (95%-CI 2.0 - 20.0) for risk group intermediate, and 3.8% (95%-CI 0 - 9.7) for risk group higher.

**Figure S1B**

OS of patients treated in curative intent of the validation set n=126.

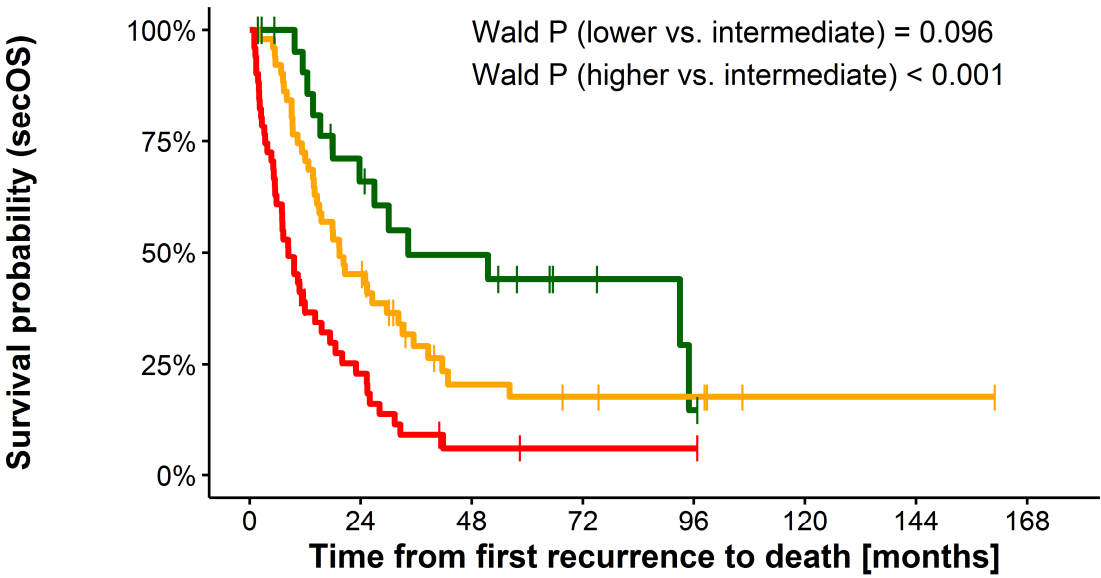

**B**

**Numbers at risk**

|              |    |    |   |   |   |   |   |   |
|--------------|----|----|---|---|---|---|---|---|
| lower        | 24 | 13 | 9 | 4 | 1 | 0 | 0 | 0 |
| intermediate | 51 | 23 | 7 | 5 | 4 | 1 | 1 | 0 |
| higher       | 51 | 10 | 2 | 1 | 1 | 0 | 0 | 0 |

The 2-year secOS proportions were 51.8% (95%-CI 29.5 – 74.2) for risk group lower, 22.6% (95%-CI 10.3 - 34.8) for risk group intermediate, and 6.1% (95%-CI 0 – 13.5) for risk group higher.

**Figure S1C**

EFS of patients treated in palliative intent of the validation set.

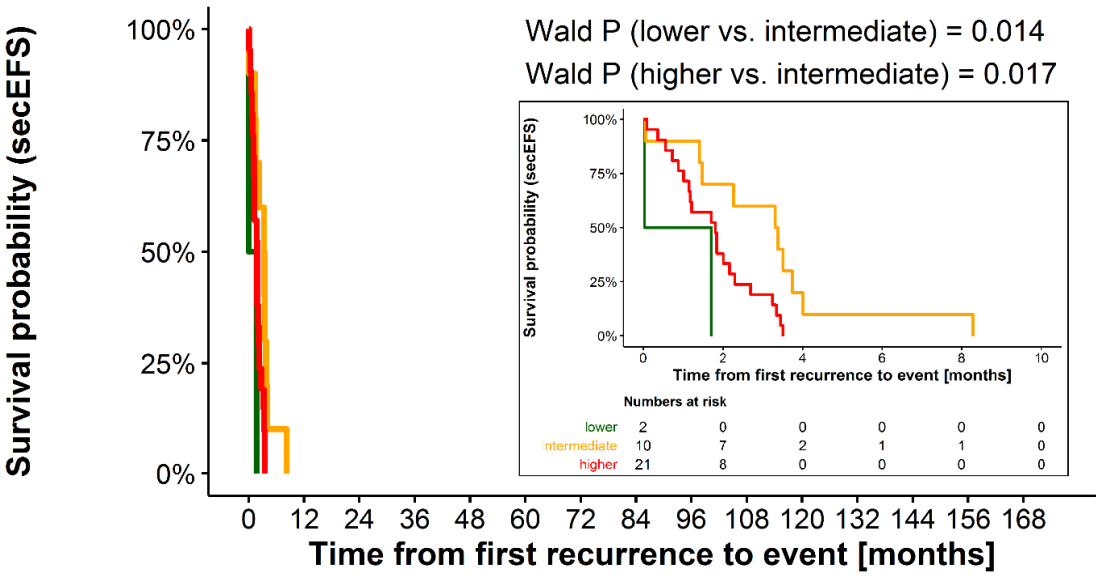

**C**

|              | 0  | 2 | 4 | 6 | 8 | 10 | 12 | 14 | 16 | 18 | 20 | 22 | 24 | 26 | 28 | 30 |
|--------------|----|---|---|---|---|----|----|----|----|----|----|----|----|----|----|----|
| lower        | 2  | 0 | 0 | 0 | 0 | 0  | 0  | 0  | 0  | 0  | 0  | 0  | 0  | 0  | 0  | 0  |
| intermediate | 10 | 0 | 0 | 0 | 0 | 0  | 0  | 0  | 0  | 0  | 0  | 0  | 0  | 0  | 0  | 0  |
| higher       | 21 | 0 | 0 | 0 | 0 | 0  | 0  | 0  | 0  | 0  | 0  | 0  | 0  | 0  | 0  | 0  |

The 2-year secEFS proportions were 0% for risk group lower, 0% for risk group intermediate, and 0% for risk group higher.

**Figure S1D**

OS of patients treated in palliative intent of the validation set.

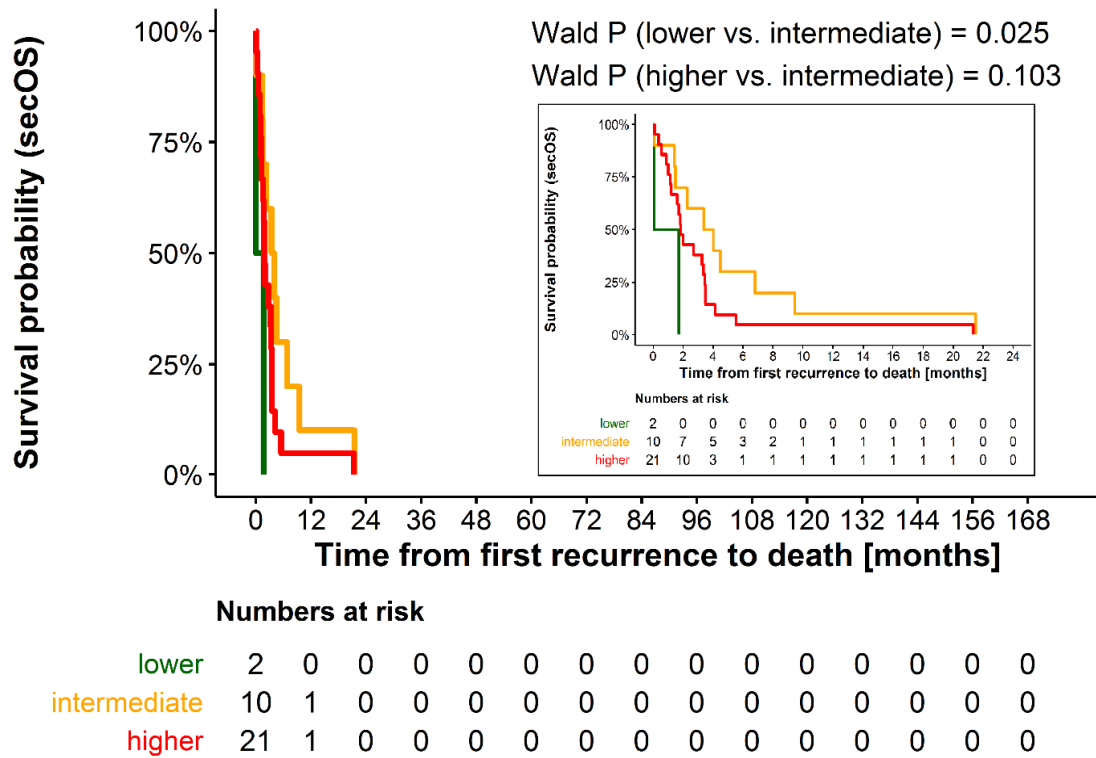

**D**

The 2-year secEFS proportions were 0 % for risk group lower, 0% for risk group intermediate, and 0% for risk group higher.
